# Supplementary material for: Mid-Devensian climate and landscape in England: new data from Finningley, South Yorkshire
Source: R Soc Open Sci. 2019 Jul 10;6(7):190577. doi: 10.1098/rsos.190577 (PMC6689596; doi:10.1098/rsos.190577)
Supplement: Table S2. Dating evidence [file rsos190577supp5.xlsx]

## Sheet: Dates in publication
Site	NGR	Latitude	Longitude	14C Date	±	-	Lab No.	from cal BP 95.4%	to cal BP 95.4%	Type	Material, context. Notes	Reliability	Reference	BugsCEP samples
Argnadarragh		54.5997	-6.2445	> 48180			SSR-2949			14C	Wood, effectively infinite. Several similar dates	5	McCabe et al. 1987	U8
Balglass Burn	NS581866	56.0512	-4.27996	28050	160		CAMS-72405	32460.5	31388.5	AMS	Carex seeds	2	Brown et al 2007	S1
Balglass Burn	NS581866	56.0512	-4.27996	31472	2316		Balglass Burn Mean	34338	38590
Balglass Burn	NS581866	56.0512	-4.27996	30080	200		CAMS-72408	34543.5	33787.5	AMS	Coleoptera	1		S1
Balglass Burn	NS581866	56.0512	-4.27996	30650	220		CAMS-72409	35005.5	34145	AMS	Coleoptera	1		S1
Balglass Burn	NS581866	56.0512	-4.27996	32770	290		CAMS-72407	37874.5	36092.5	AMS	Carex seeds	2		S1
Balglass Burn	NS581866	56.0512	-4.27996	32800	280		CAMS-72404a	37878.5	36139	AMS	Carex seeds	2		S1
Balglass Burn	NS581866	56.0512	-4.27996	32460	435	410	SRR-6362	37919	35506	14C	Humates	3		S1
Balglass Burn	NS581866	56.0512	-4.27996	34480	340		CAMS-72404 or CAMS-72406	39816	38365.5	AMS	Carex seeds	2		S1
Balglass Burn	NS581866	56.0512	-4.27996	35575	425	405	SRR-6361	41194.5	39275	14C	Humates	3		S1
Barnwell Station	TL472596	52.215	0.153171	19500	650		Q-590	25272.5	22191.5	14C	Plant debris, organic silt. Date not in paper		Coope 1968
Baston Fen	TF124135	52.7075	-0.337778	28310	320		AA-40474	33156	31418	AMS	Salix capsules	2		G125
Baston Fen	TF124135	52.7075	-0.337778	27500	800		Birm-1163	33637.5	30305.5	14C
Baston Fen	TF124135	52.7075	-0.337778	28790	330		AA-40475	33688	31858.5	AMS	Salix seeds	2	Briant et al. 2004	S1,S2,S3,S4,S5,S6,G108,G125,G141,Gl83
Baston Fen	TF124135	52.7075	-0.337778	29070	340		AA-40472	33953.5	32288.5	AMS	Salix herbacea	2		G125
Baston Fen	TF124135	52.7075	-0.337778	29270	350		AA-40473	34115	32608.5	AMS	Salix polaris	2		G125
Baston Fen	TF124135	52.7075	-0.337778	26800	1400		Birm-1164	34408	28382.5	14C	Not the same horizons?		Seddon 1984
Baston Fen	TF124135	52.7075	-0.337778	30090	390		AA-40476	34849	33566.5	AMS	Potentilla seeds	2		S1,S2,S3,S4,S5,S6,G108,G125,G141,Gl83
Baston Fen	TF124135	52.7075	-0.337778	31570	510		AA-41735	36606	34519.5	AMS	Wood, frost wedge fill	3		G141
Baston Fen	TF124135	52.7075	-0.337778	32000	2450		Birm-1165	44005	31608.5	14C
Beckford	SO982363	52.0251	-2.02765	27650	250		Birm-293	32100	31048.5	14C	Plant debris	3	Briggs et al 1975	S1
Brandon	SP384763	52.3834	-1.43725	32270	1029		Birm-10	39111.5	34418.5	14C	Peat. Reinterpretation of strat suggests MIS 12	5	Osborne & Shotton 1968; Maddy et al. 1999
Brimpton	SU568651	51.3821	-1.18522	26340	1210		BM-1638	33502.5	28281.5	14C	Twigs	3	Bryant et al 1983	S64B
Brimpton	SU568652	51.3821	-1.18522	29500	460		BM-1874	34575.5	32636	14C	Twigs	3		S88B
Coleshill	SP201907	52.5139	-1.70528	32160	1780	1450	NPL-55	41542	33834	14C		3	Coope & Sands 1968	S1
Crossbrae Farm	NJ753512	57.5503	-2.41444	>53630			SRR-5706b	>50000		AMS	Humin. Several dates but all outside range	5	Whittington et al. 1998	A_bulk,B1,B2,B3
Deeping St James	TF183083	52.6595	-0.252376	35700	800		AA-41160	41832.5	38759.5	AMS	Armeria seeds. OSL date is 78560 +/- 6760	2	Briant et al. 2004	DSJ-33,DSJ-34
Deeping St James	TF183083	52.6595	-0.252376	37240	890		AA-41161	43099.5	40123.5	AMS	Polygonum seeds	2		DSJ-33,DSJ-34
Deeping St James	TF183083	52.6595	-0.252376	40300	1300		AA-41162	46834	42160	AMS	Carex seeds	2		DSJ-33,DSJ-34
Derryvee	H361390	54.2984	-7.44546	30600	1170	1030	Birm-166	38205.5	32699	14C			Colhoun et al. 1972	s1
Dimlington	TA391271	53.6917	0.0825	18240	250		Birm-108	22611.5	21451	14C	Plant debris. Mosses may include hard water error	3	Penny et al. 1969	S1
Dimlington	TA391271	53.6917	0.0825	18500	400		I-3372	23389.5	21437	14C	Plant debris	3		S1
Earith	TL388764	52.3681	0.0372222	42000	1890	1530	Birm-88	49550	43168	14C	Plant debris. Effectively infinite	4	Coope 2000	E7
Earith	TL388764	52.3681	0.0372222	>45000			Birm-86	>50000		14C	Plant debris. Effectively infinite	4		E9
Farnham	SU820446	51.1947	-0.82788	36600	2400	1800	O-2354	47602	37719	14C	Plant debris		Moseley 1983
Finningley	SK675977	53.4717	-0.98519	37057	473		UBA-33853	42326.5	40744.5	AMS	Empetrum seeds	2		Site_2
Fladbury	SO975468	52.1195	-2.03806	38000	700		Gro-1269	43320	41250	14C		3	Coope 1962	S1
Fliquet Bay		49.2292	-2.02222	>25500			Birm-955			14C	Twigs	5	Coope et al. 1980	f1/1,f2/2,f2/3,f2/4
Four Ashes	SJ916082	52.6714	-2.12556	38500	1200	1050	Birm-170	45076	41182	14C			Morgan 1973	S12
Four Ashes	SJ916082	52.6714	-2.12556	30655	765	700	Birm-25	36409.5	33570	14C			Morgan 1973	S2
Four Ashes	SJ916082	52.6714	-2.12556	>43500			Birm-74	>50000					Morgan 1973	S20
Four Ashes	SJ916082	52.6714	-2.12556	36340	770	700	Birm-24	42267.5	39603	14C			Morgan 1973	S3
Four Ashes	SJ916082	52.6714	-2.12556	40000	1400	1200	Birm-196	46941.5	42095	14C			Morgan 1973	S34
Four Ashes	SJ916082	52.6714	-2.12556	42530	1345	1115	Birm-56	49232	44067	14C			Morgan 1973	S4
Four Ashes	SJ916082	52.6714	-2.12556	30500	440		Birm-195	35353.5	33782	14C			Morgan 1973	S45
Great Billing	SP826617	52.2473	-0.79156	28225	330		Birm.-75	33069	31347.5	14C	Whole organics, loose block in pit. No strat and faunas may not relate to same event	4	Morgan 1969	A,B,C,D,E,F,G,H
Isleworth	TQ158746	51.4586	-0.334722	43140	1520	1280	Birm-319	49795.5	44575	14C	Plant debris	3	Coope & Angus 1975	S
Kempton Park	TQ118703	51.4208	-0.393611	35230	185		Q-2019	40304	39288	14C	Plant debris	3	Gibbard et al. 1982	A3
Kirby on Bain	TF228605	53.1275	-0.166187	34800	1000		Birm-250	41601	37017.5	14C	Plant debris. Reinterpretation of strat suggests MIS 6. Date is from 'near base of the gravels.'	5	Bridgland et al. 2014	S14C,A1,A2,A3,A4,A5,B1,B2,B3,B4,B5,B6,B7
Leeds Oxbow	SE362303	53.7678	-1.45222	38600	1720	1420	NPL-163B	46966	40569	14C	mammoth tusk	4	Gaunt et al. 1970	S1
London: Ismaili Centre (C2)	TQ267787	51.4931	-0.17634	38000	2000		Birm-1102	47445.5	38949	14C	Plant debris	3
Lynford	TL825948	52.5205	0.688444	53700	3100		OxA-11571	67749.5	48863	AMS	Mammoth bone	3
Lynford	TL825948	52.5205	0.688444	>49700			OxA-11572	>50000		AMS	Mammoth bone	3	Coope 2012
Minworth	SP168918	52.5238	-1.75319	10530	156		NPL-27c	12730.5	11968	14C	Plant debris. Contaminated by sewage	5	Coope & Sands 1966
North Lechlade (IV)	SP217015	51.7118	-1.68733	28400	1000		Birm-1170	34586	30885.5	14C	Organic silt		Briggs et al. 1985	S1
Pode Hole	TF265038	52.6172	-0.13293	36900	900		AA-41736	42860.5	39786.5	AMS	Salix polaris. Date regarded as a minimum	1	Briant et al. 2005	PH21
Pode Hole	TF265038	52.6172	-0.13293	37900	1200		AA-41737	44549.5	40240.5	AMS	Salix leaves. Date regarded as a minimum	1		PH21
Queensford (Dorchester on Thames)	SU582952	51.6525	-1.16028	37350	1350	1150	Birm-333	44490.5	39749	14C	Plant debris	3	Briggs et al. 1985	F2
Radwell	TL006586	52.2164	-0.528917	40500	1380	1180	SRR-2980	47356	42417	14C	Should be regarded as a minimum		Rogerson et al. 1992	S20-30cm,S30-40cm
Radwell	TL006586	52.2164	-0.528917	43250	2010	1610	SRR-2981b	>50000	44554	14C	Abies wood. Date unlikely for Abies so >			S20-30cm,S30-40cm
Sandy	TL18174750	52.1132	0.275719	29250	460	420	Q-2935	34305	32296	14C	Plant debris	3		S1
Sandy	TL18174750	52.1132	0.275719	34055	330	310	Q-2936	39439	37705	14C	Plant debrs	3		S1
Standlake Common	SP395020	51.7153	-1.42966	29200	300		Birm-334	33975	32673	14C	Plant debris	3	Briggs et al. 1985	S1
Sutton Courteney	SU520936	51.6388	-1.24999	33190	3450		IGS-147	48630.5	32689	14C	Peat	3	Briggs et al. 1985	F2
Syston	SK610110	52.6933	-1.09889	37420	1670	1390	Birm-78	45522.5	39400	14C	Plant debris	3	Bell et al. 1972	S1
Tattershall Castle	TF209572	53.0985	-0.195591	42000	1400	1100	Birm-309	48851	43499	14C				MN, MH, US
Tattershall Castle	TF209572	53.0985	-0.195591	42100	1400	1100	Birm-398	48938	43595	14C	Fine organic matter, from Lower Silt
Tattershall Castle	TF209572	53.0985	-0.195591	44300	1600	1300	Birm-408	>50000	45808	14C	Plant debris, from Lower Silt			MN, MH, US
Tattershall Castle pit Upper silts	TF209572	53.0985	-0.195591	42000	1000		Birm-409	47769	43234	14C	Plant debris, from Anodonta Bed. Should be regarded as a minimum.		Girling 1980	CE,RG,MH,FD,UC,UB,UA,Not_located
Tattershall Castle pit Upper silts	TF209572	53.0985	-0.195591	44300	1600	1300	Birm-341	>50000	45808	14C	Should be regarded as a minimum			CE,RG,MH,FD,UC,UB,UA,Not_located
Twyning	SO896357	52.0196	-2.15267	36600	2050	1640	Birm-599	46307	38211	14C	Plant debris. Some doubt so probably >	3	Whitehead 1992	S1_3,S5
Upton Warren	SO935673	52.3038	-2.09675	41900	800		GRO-1245	47017	43880.5	14C	Plant debris. Should be regarded as a minimum	3		B2
Upton Warren	SO935673	52.3038	-2.09675	41500	1200		GRO-595	47802	43022.5	14C	Plant debris. Should be regarded as a minimum	3	Coope et al. 1961	B2,B3
Upton Warren	SO935673	52.3038	-2.09675	44300	1600			>50000	45523.8	14C	Plant debris. Should be regarded as a minimum	3	Coope 1977?
Whiteacre Heath	SP212924	52.5291	-1.68893	10560	142		NPL-56	12725.5	12055.5	14C	Plant debris. Probably contaminated by sewage	5	Coope & Sands 1966	S
Whitemoor Quarry	SK173127	52.7117	-1.74536	41690	400		OxA-15845	45841	44390.5	AMS	Bone	4	Schreve et al. 2012	S6/8,S6/7,S6/6,S5,S4
Whitemoor Quarry	SK173127	52.7117	-1.74536	42850	450		OxA-15844	47084	45234.5	AMS	Bone	4		S6/8,S6/7,S6/6,S5,S4
Whitemoor Quarry	SK173127	52.7117	-1.74536	43350	500		OxA-15853	47794.5	45574	AMS	Bone	4		S6/8,S6/7,S6/6,S5,S4

## Sheet: Explanation
Site name
As referred to in the text
NGR
United Kingdom National Grid Reference
Latitude/Longitude
WGS84 coordinates
Lab no.
Dating lab reference number. Any inconsistencies reflect the quality of metadata in publications or records
Cal BP
Dates in calendar years before 1950 calibrated with OxCal (Bronk Ramsey 2009) using the IntCal 13 curve (Reimer et al. 2013)
Material, context. Notes
Information on material dates where available plus notes relevant to interpretation
Reliability
Reliability of radiocarbon date on a scale of 1-5. Blanks were not evaluated due to insufficient background information or relevance for the publication.
1	Direct dating of insect remains
2	Direct dating of identified plant macrofossils from same sample as insect remains
3	Dating of unidentified plant matter or AMS on identified bone from same context as insect remains
4	Dating of unidentified plant matter of uncertain context or unidentified bone
5	Date discarded due contamination or unreliable prevenience
Reference
See text for more site date references
BugsCEP samples
Name of samples as stored in the BugsCEP database (www.bugscep.com)
Blank cells indicate a date on associated sediments, rather than a specific insect sample
Note that not all samples are used in the climate reconstruction figure (See Supplementary Table 1)

## Sheet: Credits
See publication for references
Title:	Mid Devensian climate and landscape in England.
Authors:	Philip I Buckland, Mark D Bateman, Ole Bennike, Paul C Buckland, Brian M Chase, Charles Frederick, Malcolm Greenwood, Julian Murton, Della Murton, Eva Panagiotakopulu
Journal:	Royal Society Open Science
Contact:	philip.buckland@umu.se
